# Supplementary material for: Spectroscopic, structural and thermal study of Y(OH)3microstructures synthesized by hydrothermal method: effect of the reaction time
Source: PeerJ journal article supplement (doi:10.7717/peerj-matsci.23), 2022-10-18
Supplement: TableS1.docx [file TableS1.docx]

**Table S1.** Calculated Crystallite size and crystal micro strain for Y(OH)3 phase in the sample obtained at 2h.

| **(hkl)** | **Crystallite Size (nm)** | **Strain** |
| --- | --- | --- |
| **(100)** | 270 | 0.00151 |
| **(110)** | 270 | 0.00151 |
| **(101)** | 494 | 0.00151 |
| **(111)** | 360 | 0.00151 |
| **(200)** | 270 | 0.00151 |
| **(201)** | 340 | 0.00151 |
| **(120)** | 270 | 0.00151 |
| **(300)** | 270 | 0.00151 |
