# Supplementary figures and images for: Spectroscopic, structural and thermal study of Y(OH)3microstructures synthesized by hydrothermal method: effect of the reaction time
Source: PeerJ journal article supplement (doi:10.7717/peerj-matsci.23), 2022-10-18

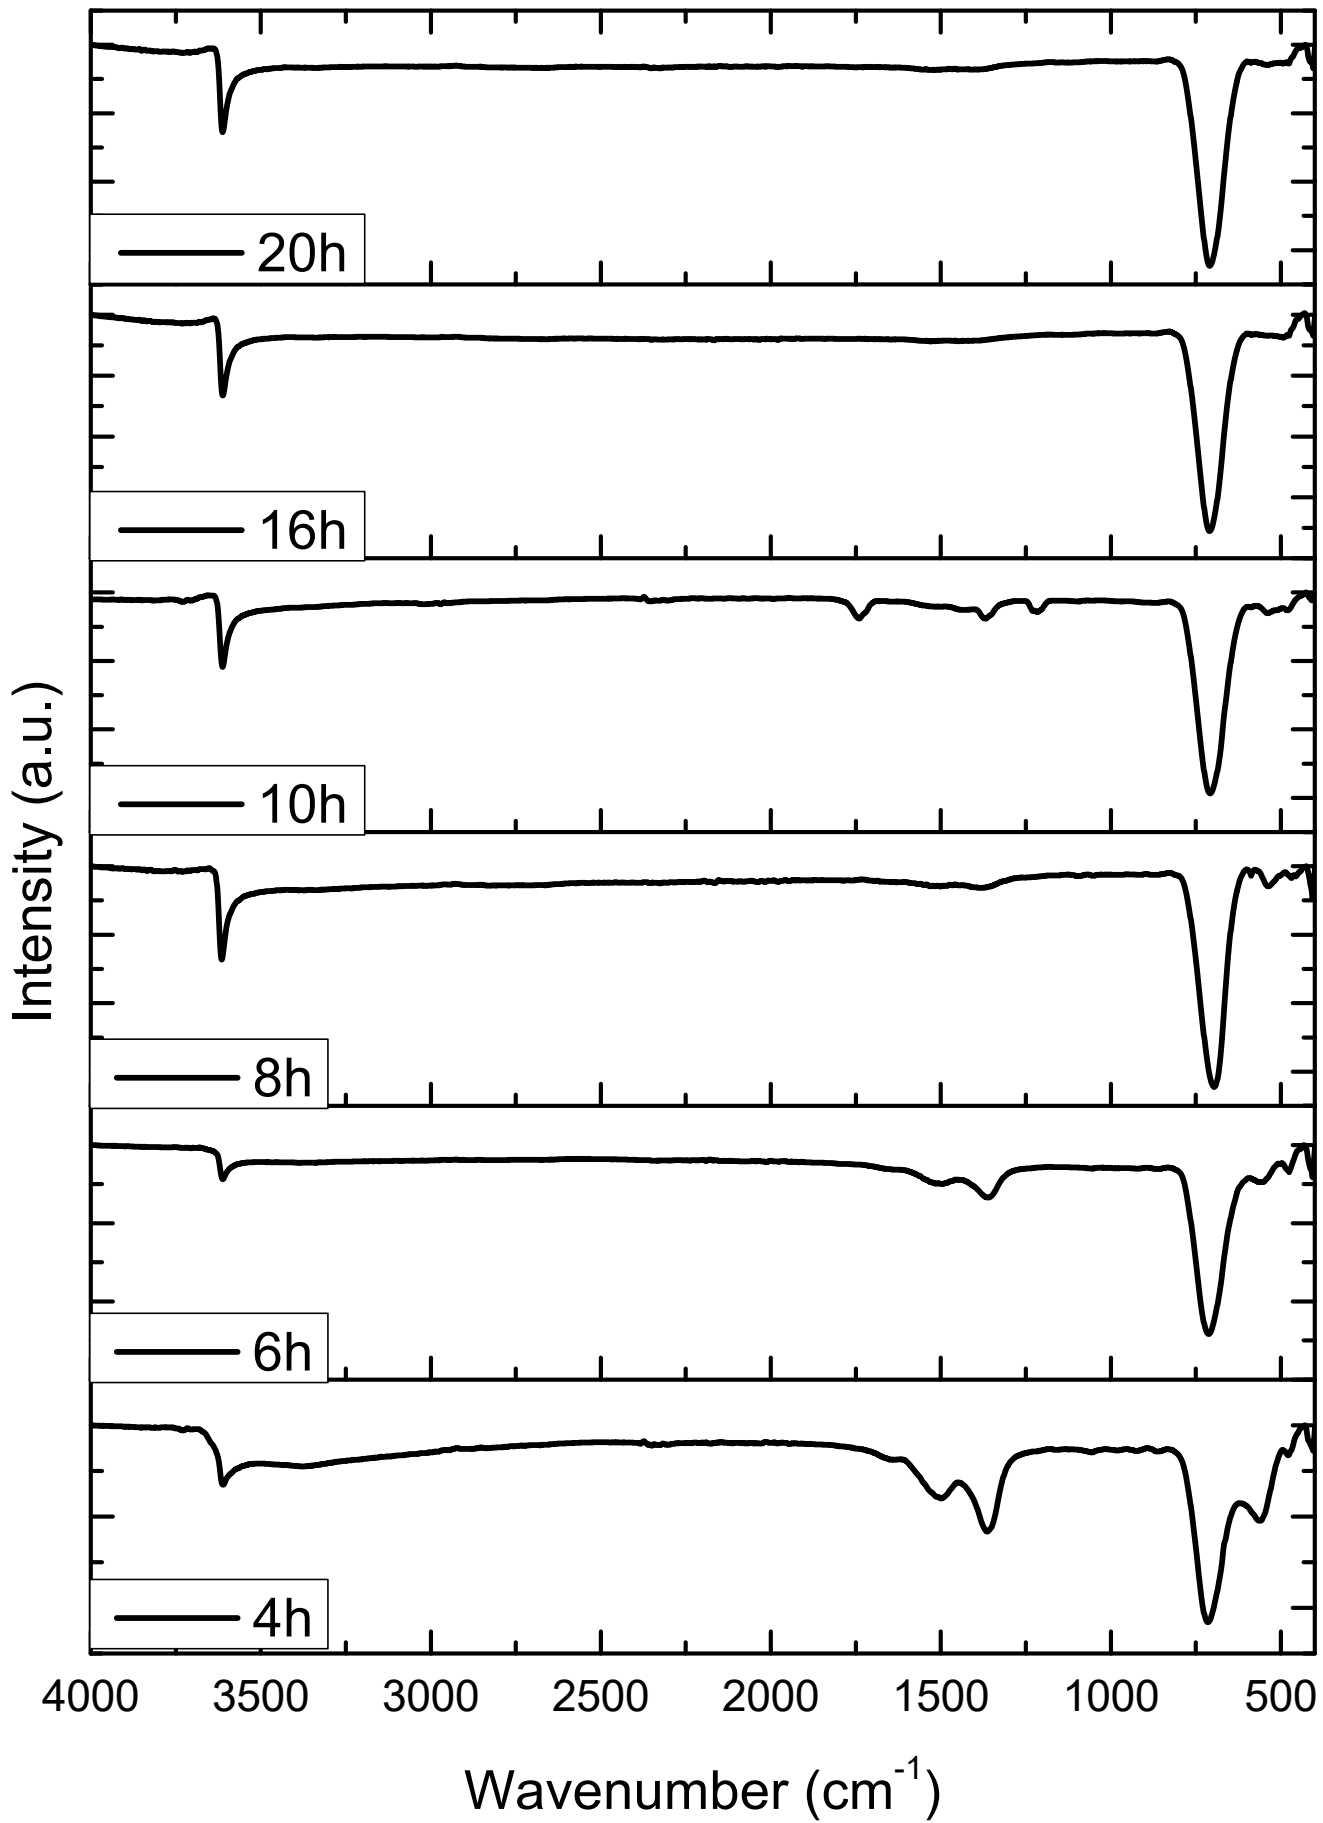

Supplement: FigureS1.pdf [file FigureS1.pdf]

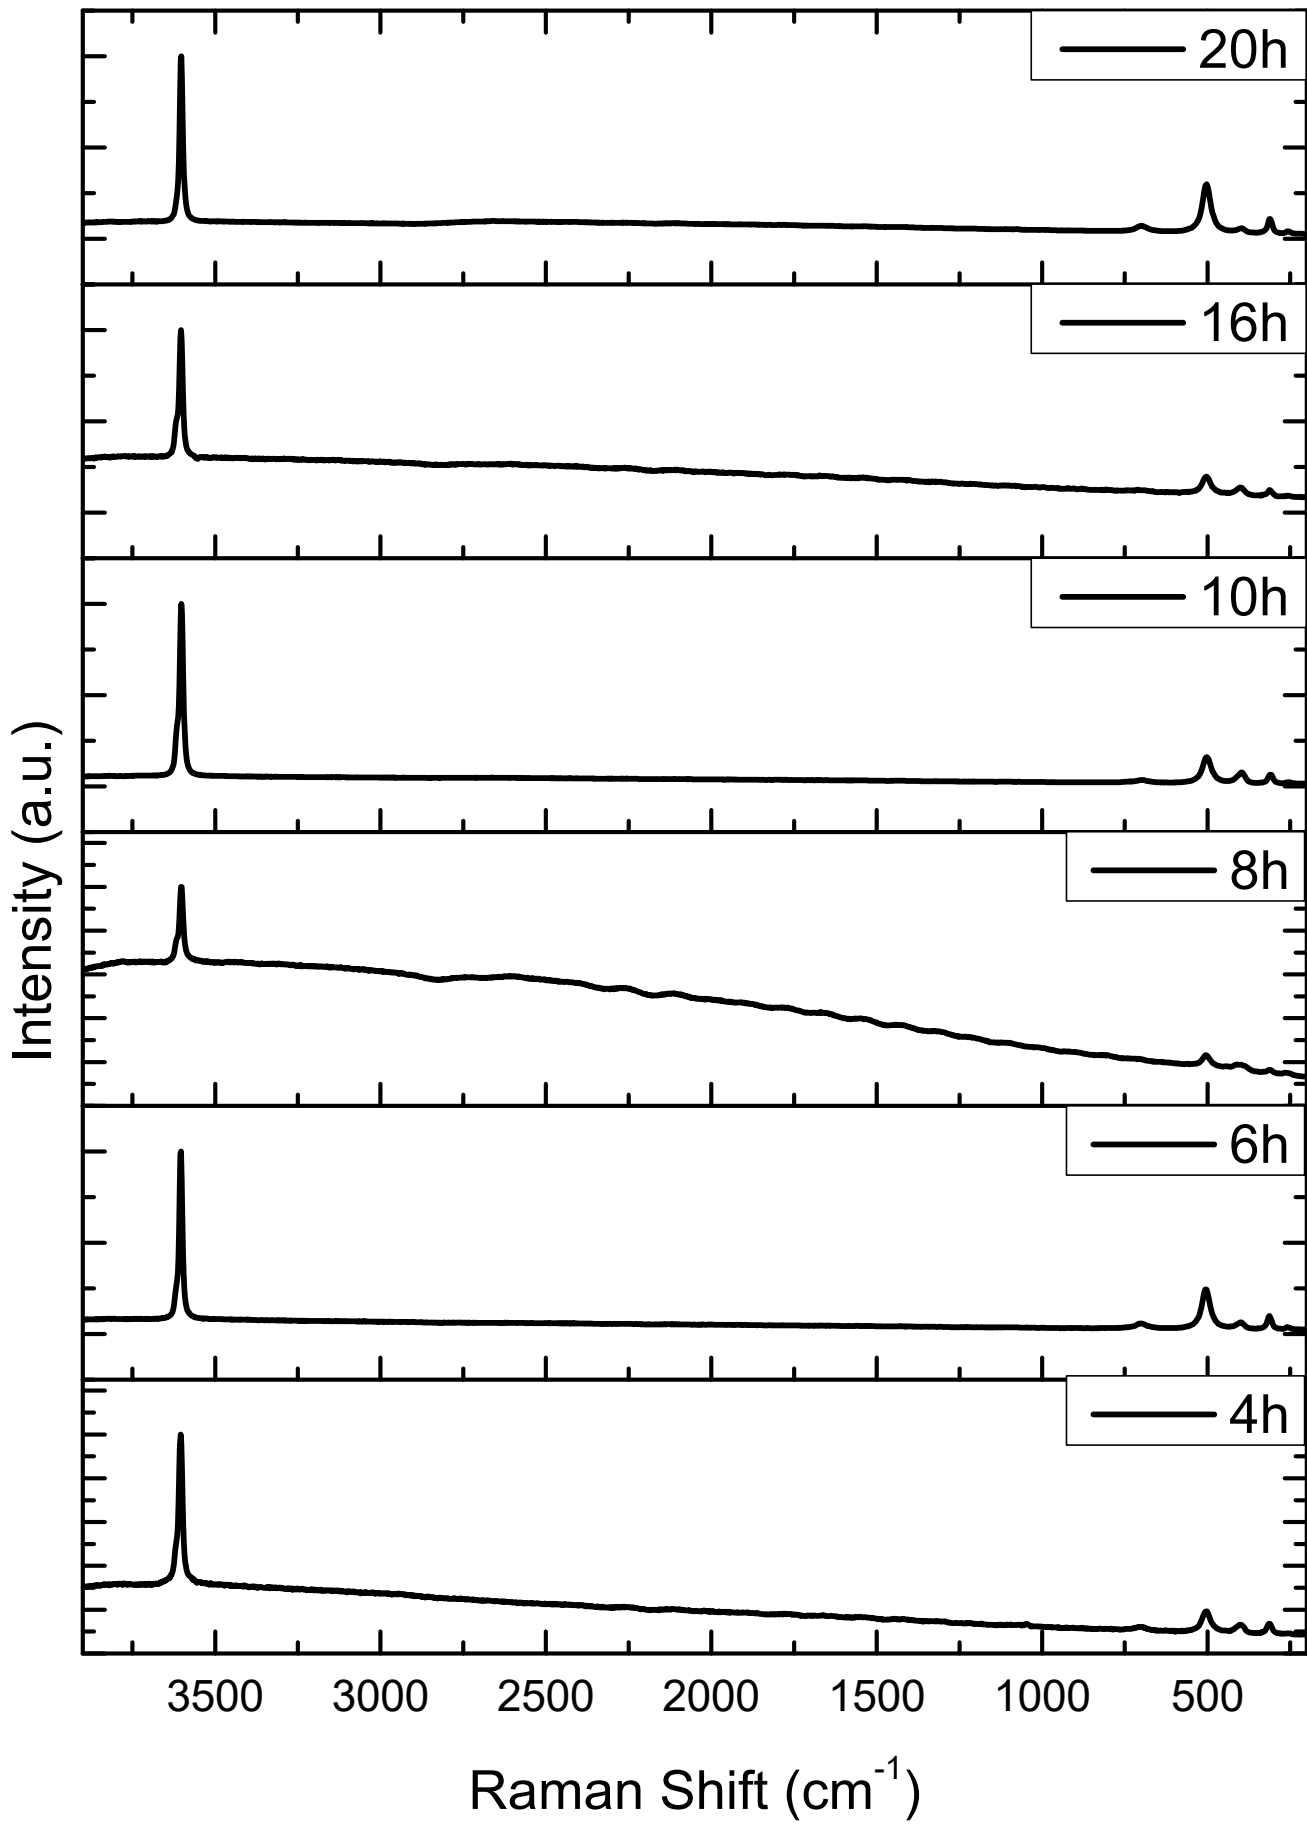

Supplement: FigureS2.pdf [file FigureS2.pdf]

$a=6.2750 \text{ \AA}$   
 $c=3.5507 \text{ \AA}$   
P63/m  
Hexagonal

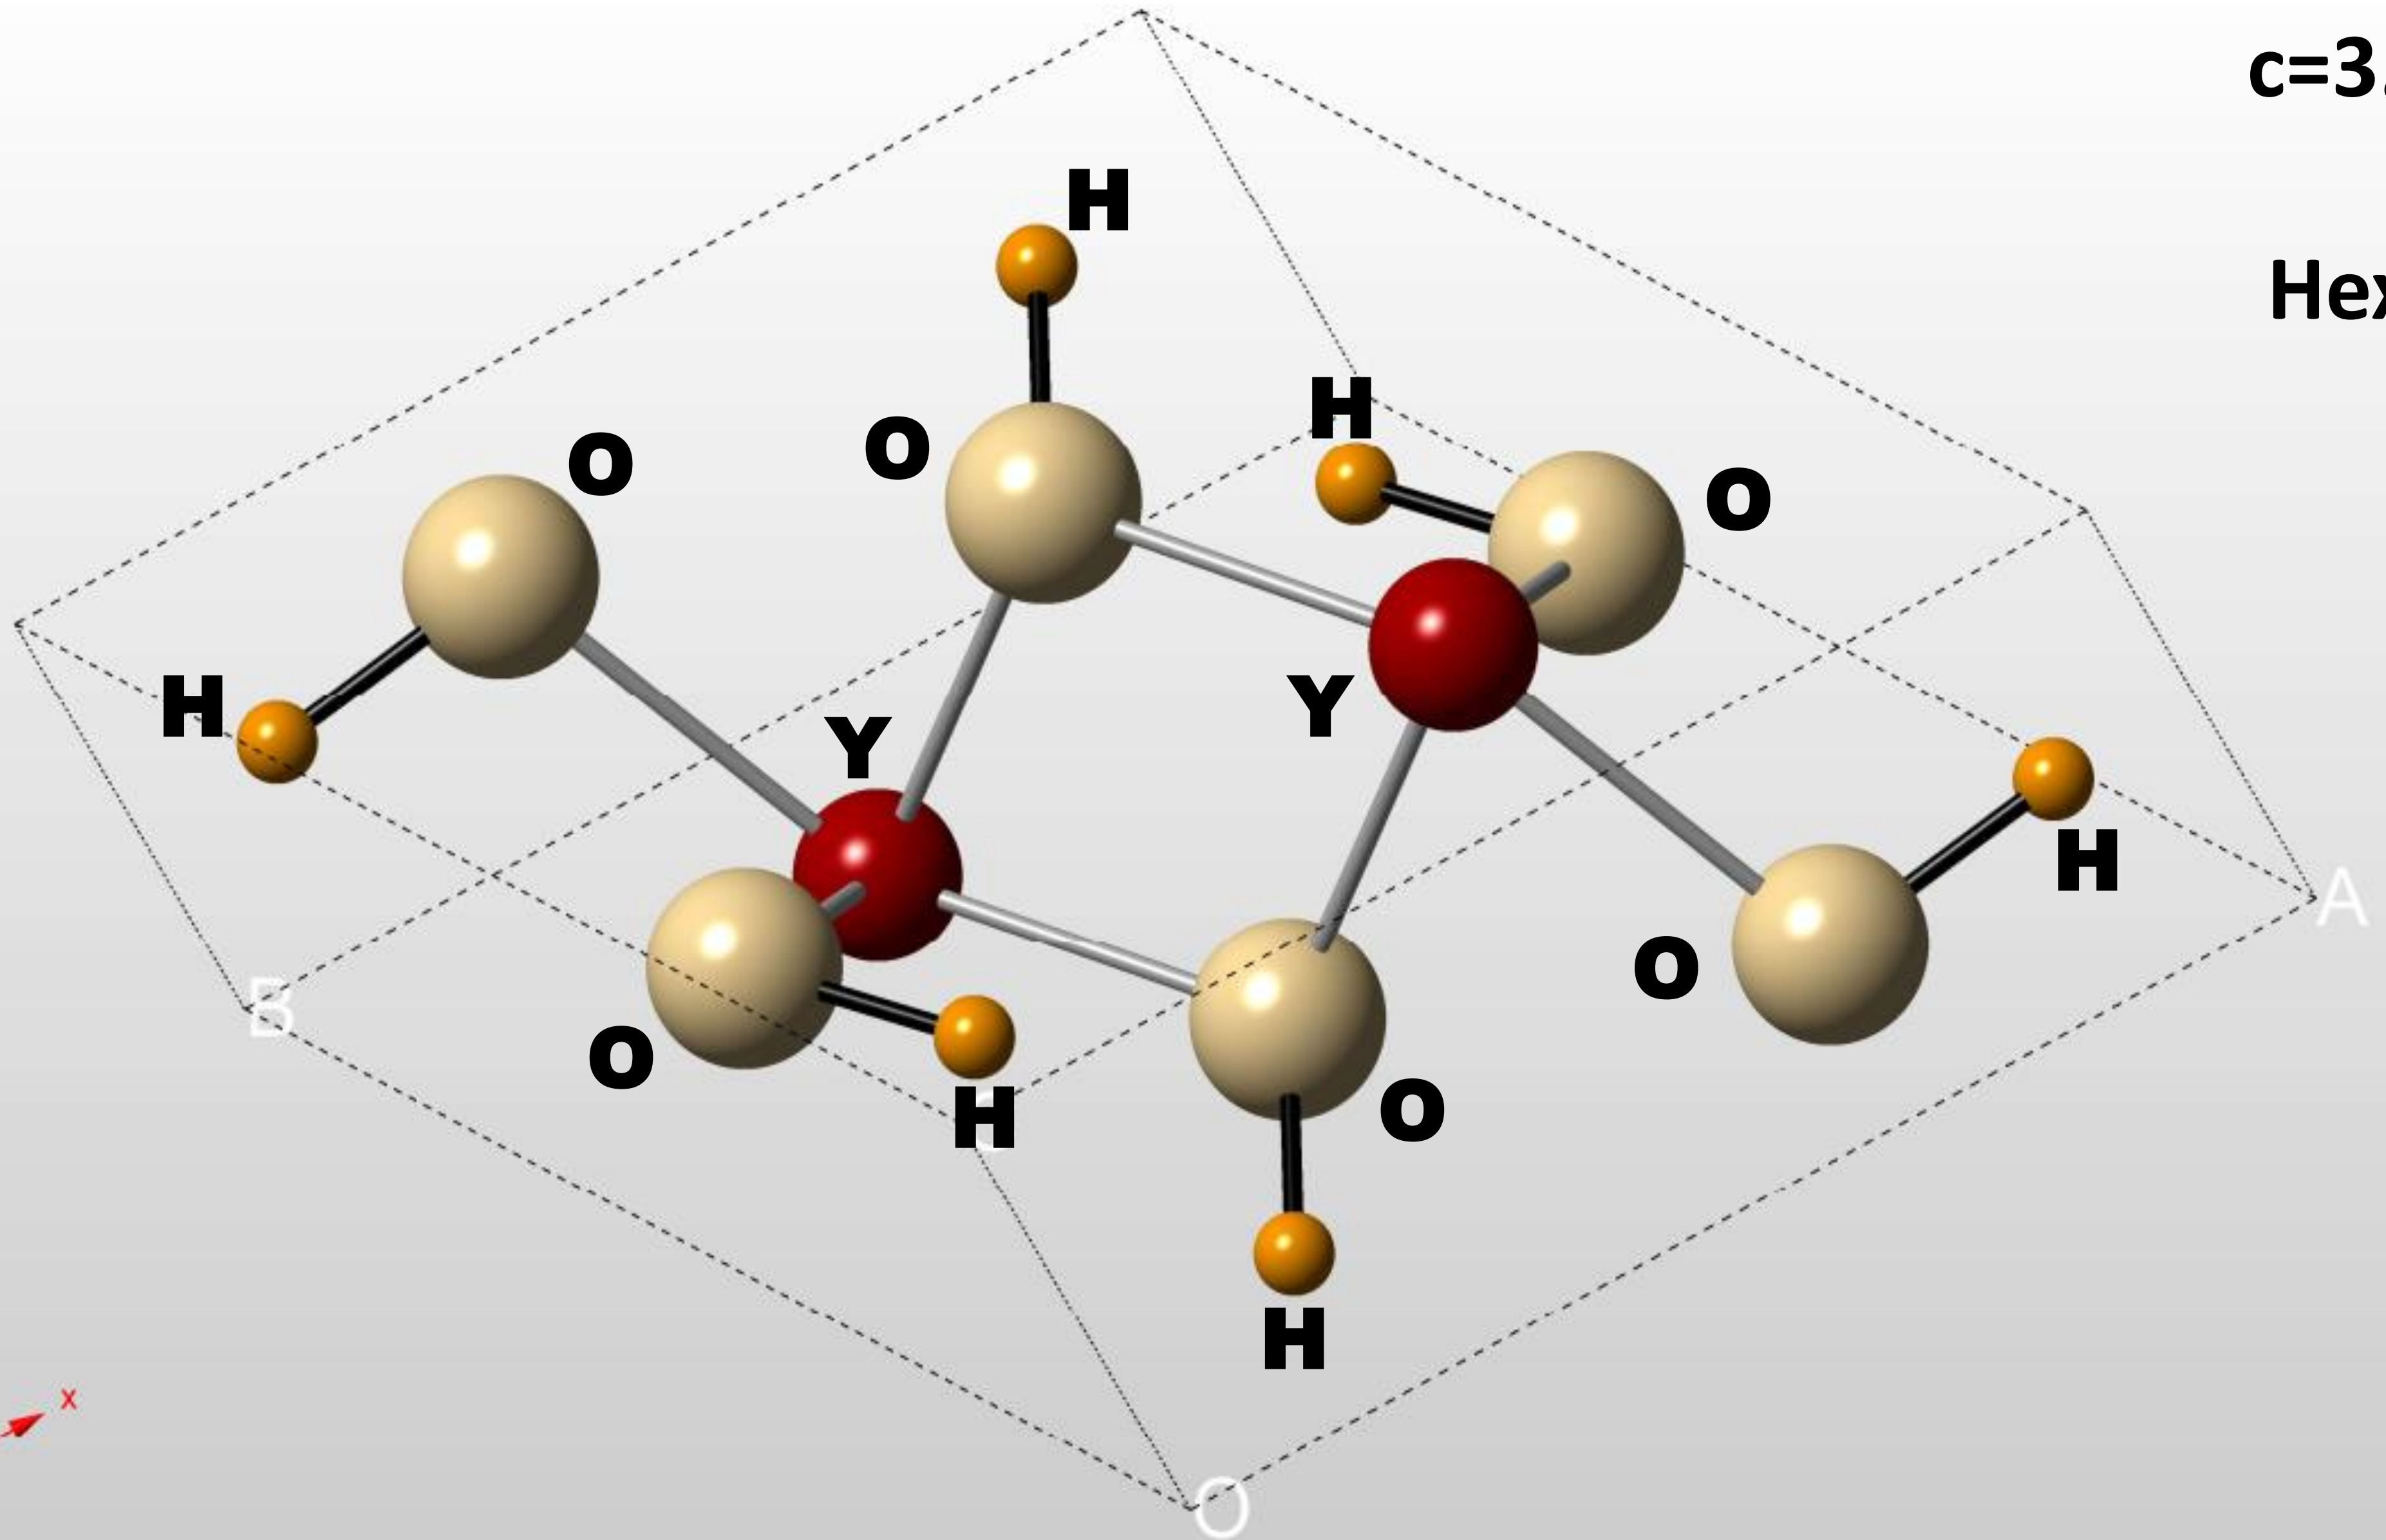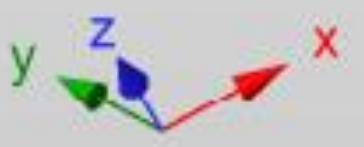

Supplement: FigureS3.pdf [file FigureS3.pdf]

# Energy dispersive X-ray spectrum of $\text{Y}(\text{OH})_3$

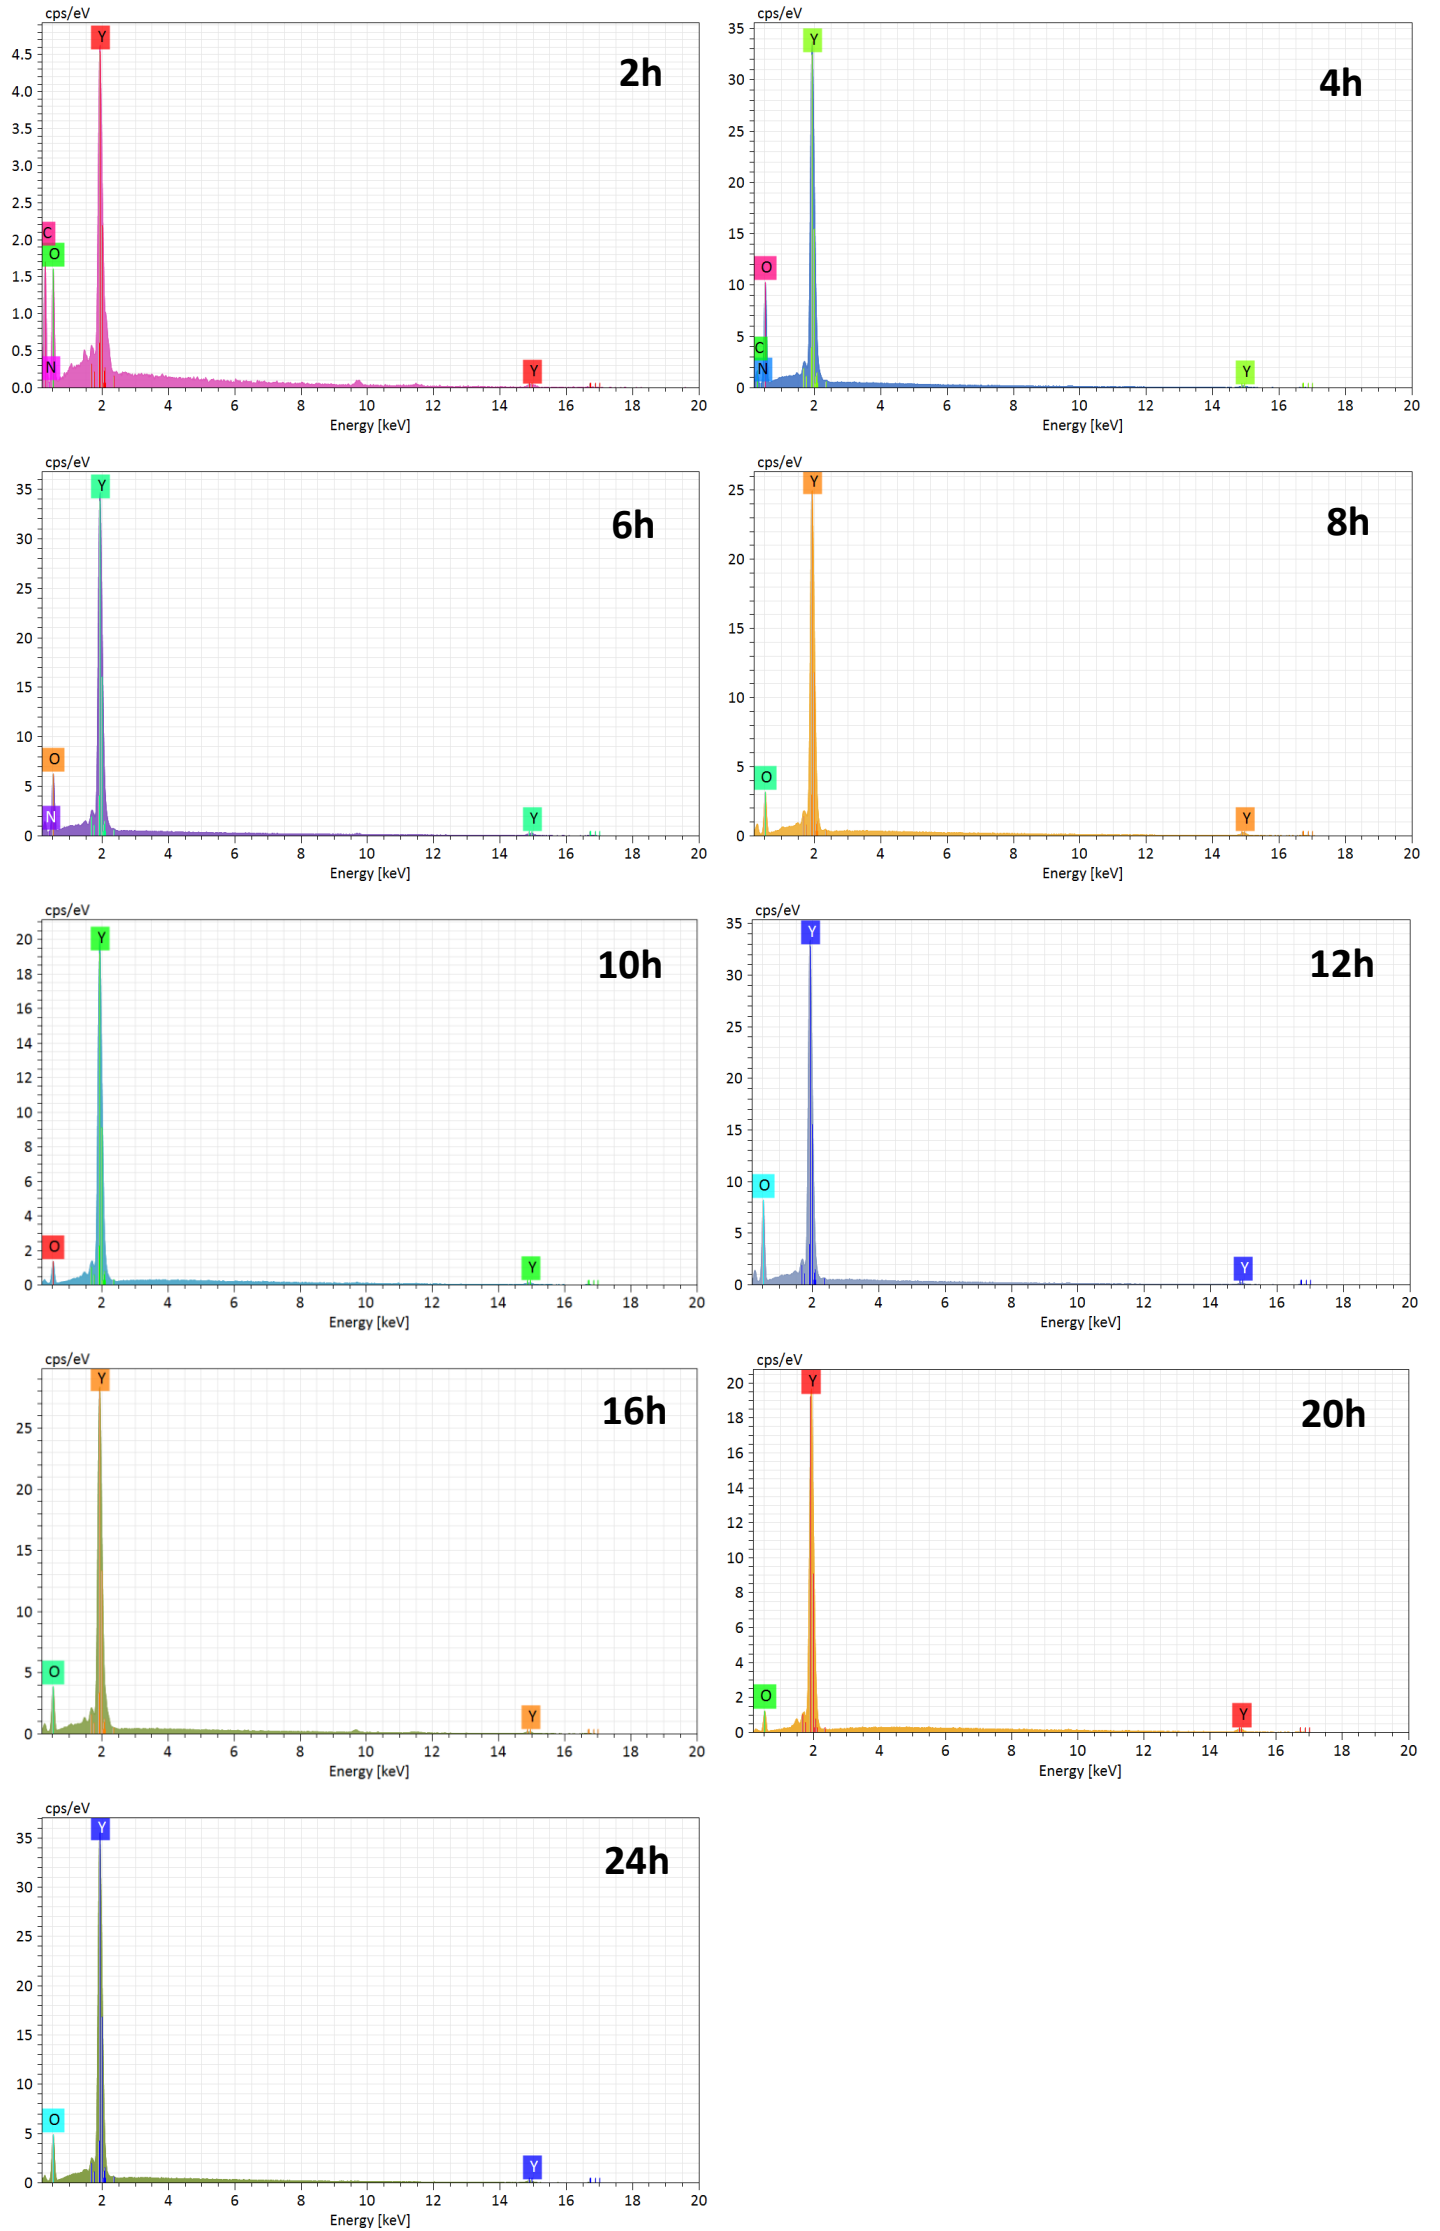

Supplement: FigureS4.pdf [file FigureS4.pdf]

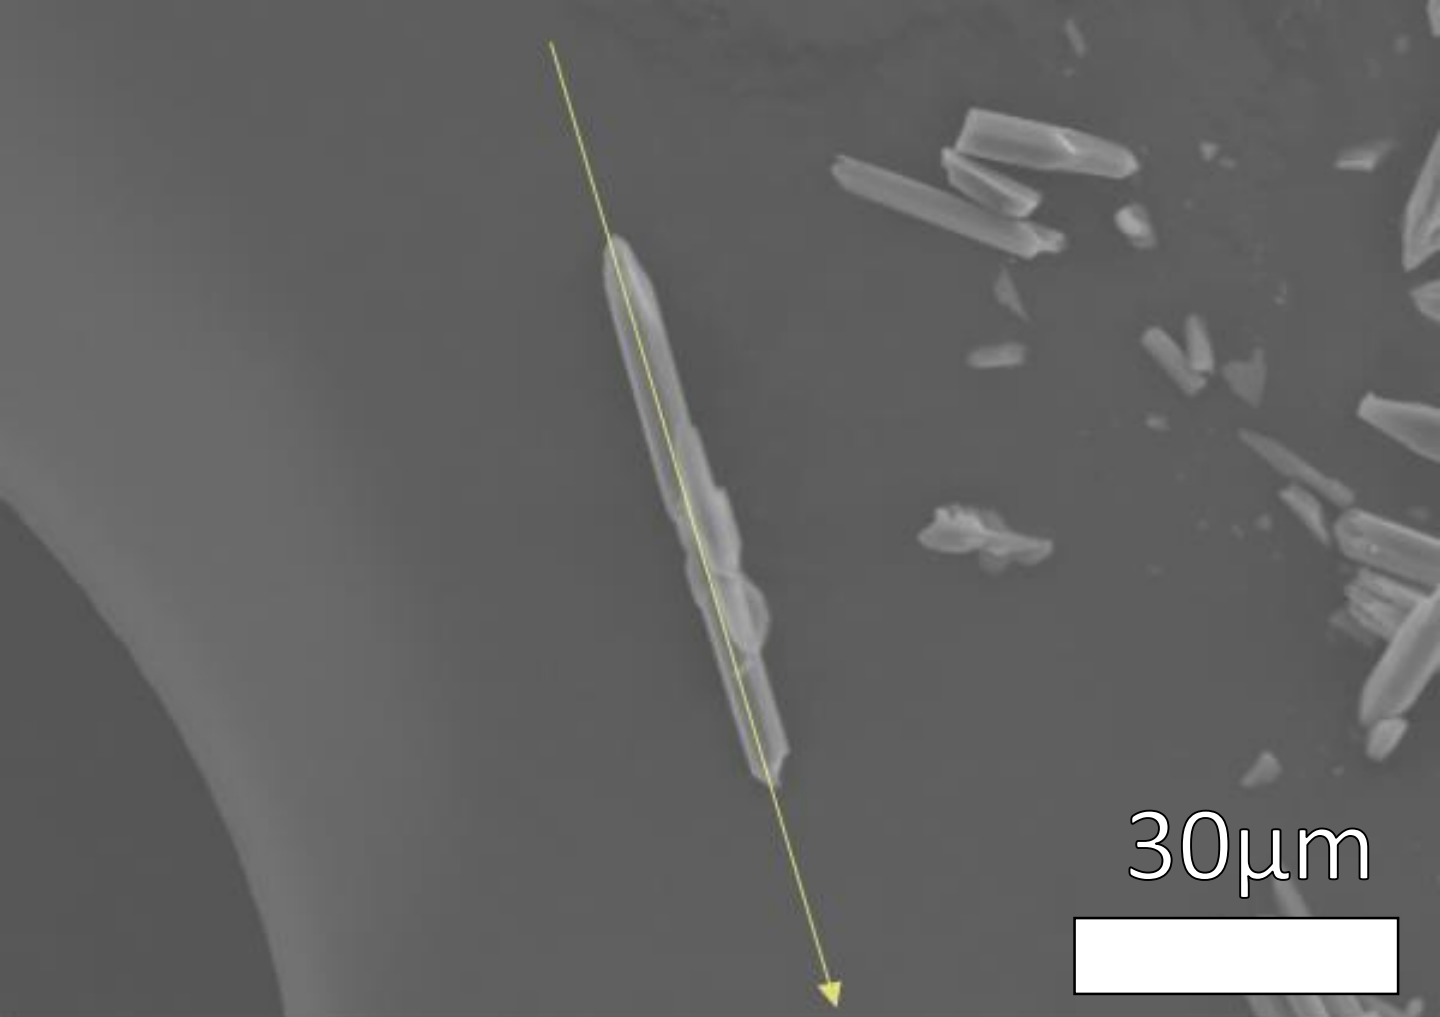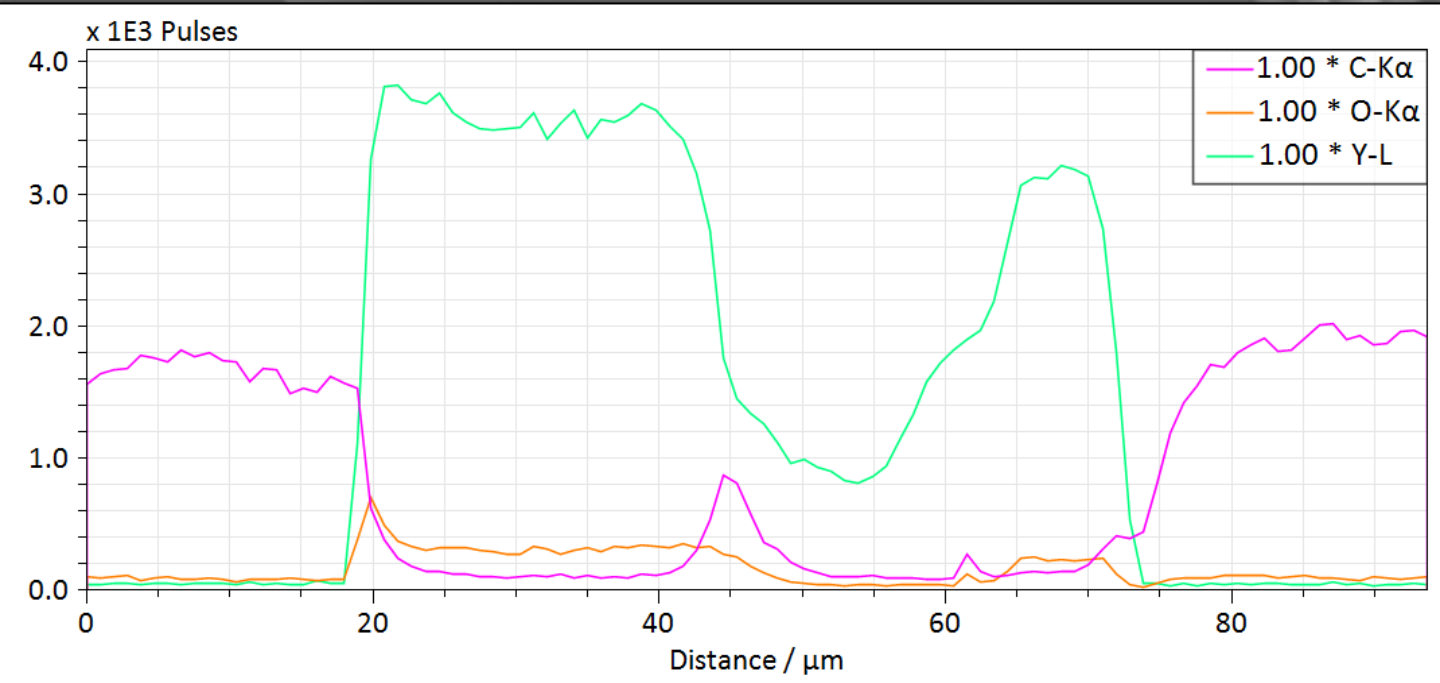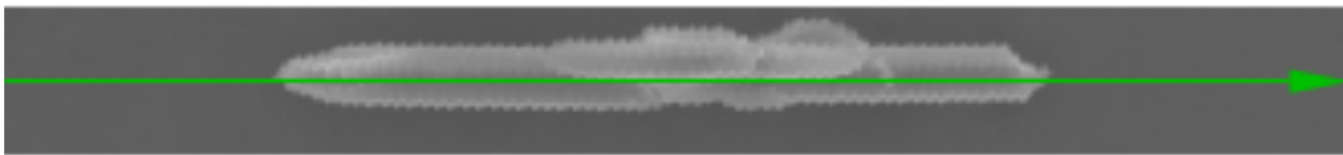

Supplement: FigureS5.pdf [file FigureS5.pdf]

Intensity (a.u.)

$R_p = 5.88 \%$   
 $R_{wp} = 7.41 \%$   
 $GoF = 1.91$

- Experimental
- Calculated
- Background
- $Y(OH)_3$
- $Y(OH)_2NO_3$
- $Y(NO_3)_3(H_2O)_6$

10 15 20 25 30 35 40 45 50 55  
2 theta (°)

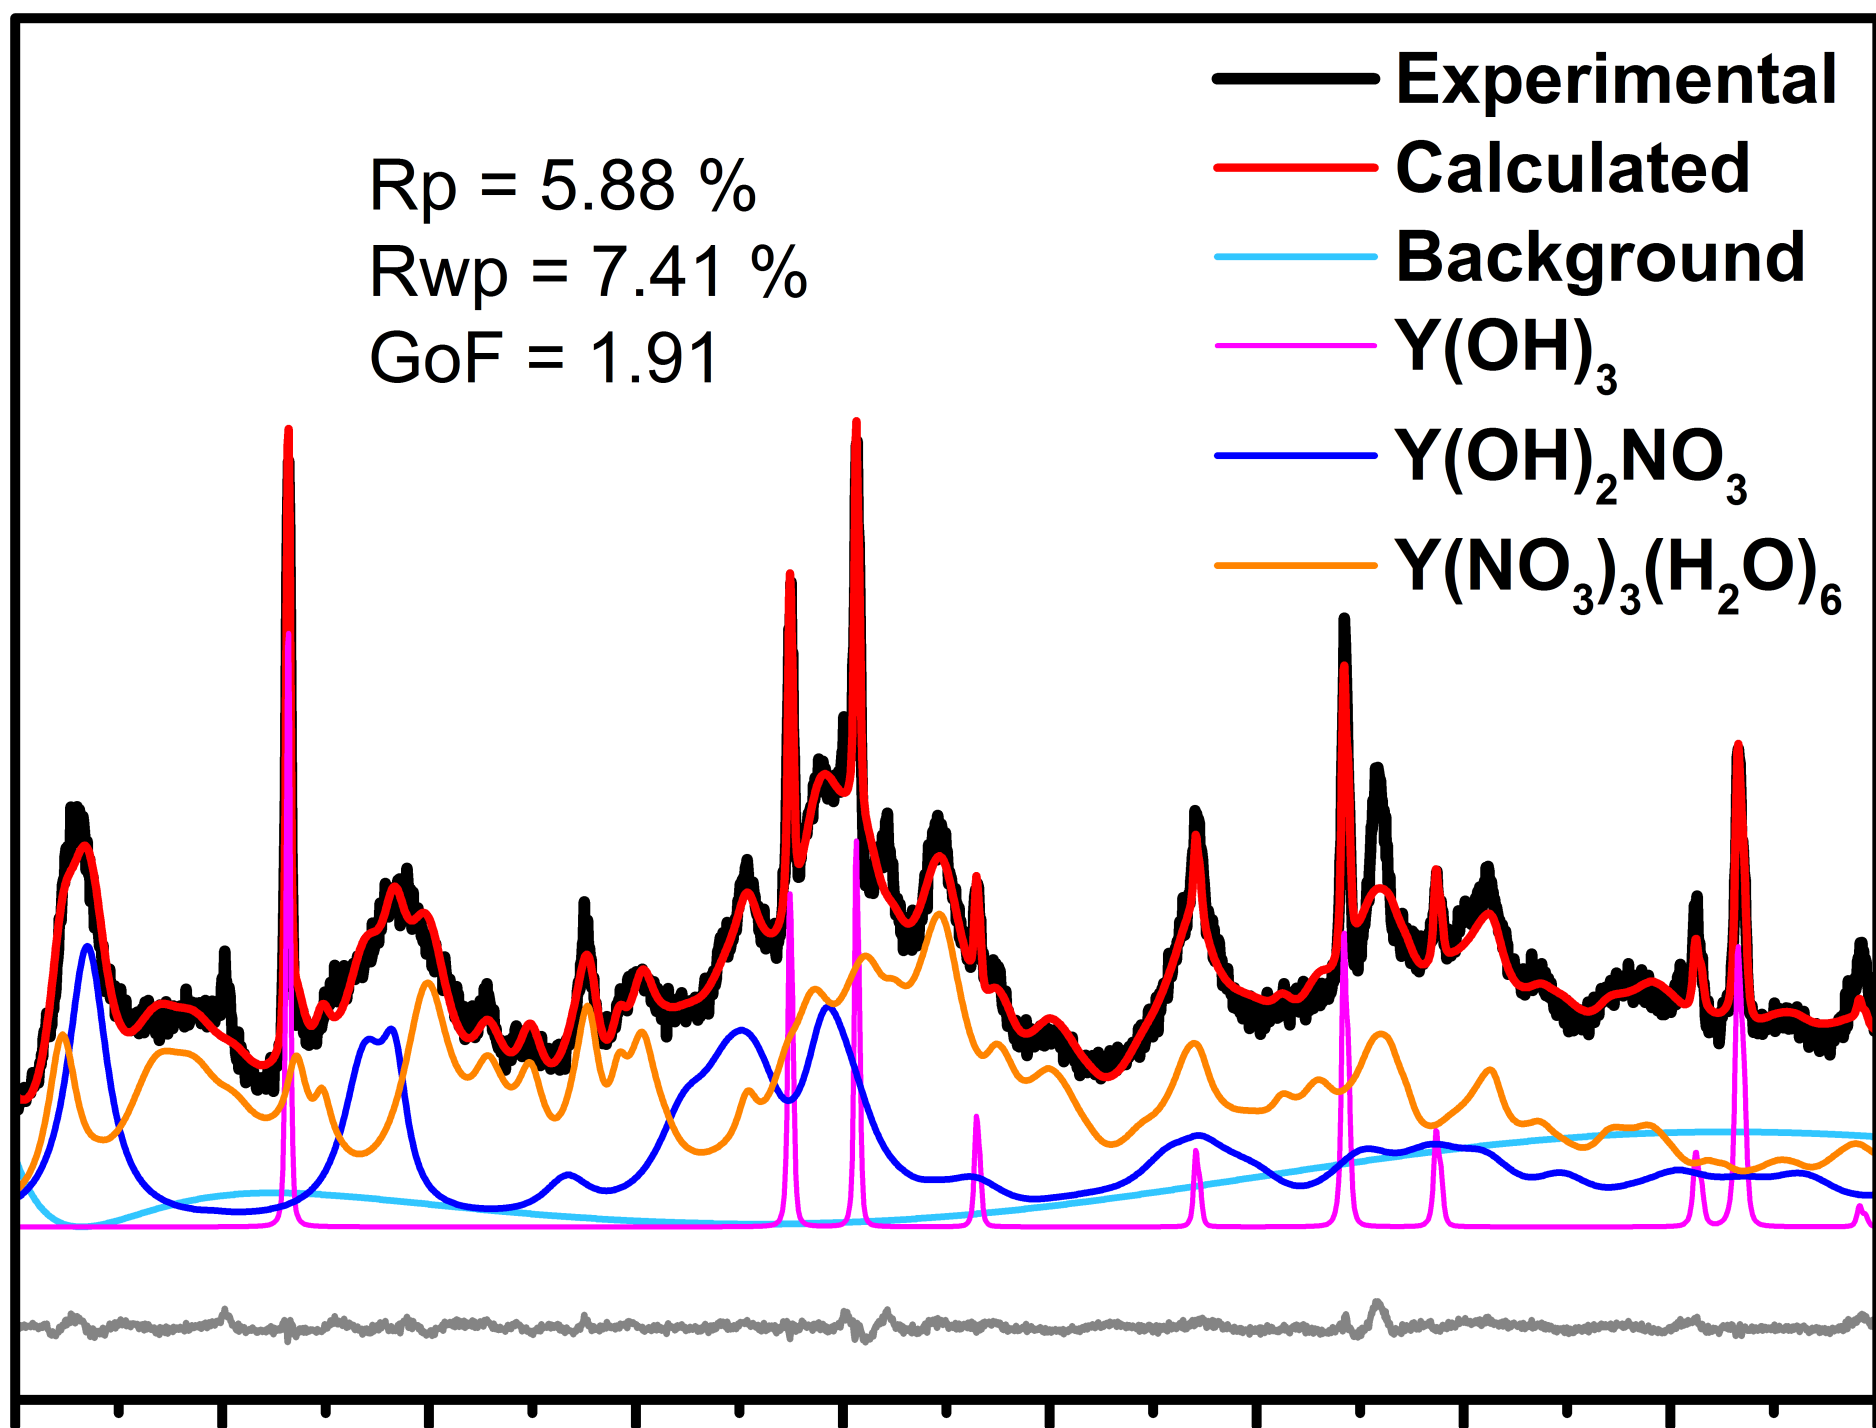

Supplement: FigureS6.pdf [file FigureS6.pdf]

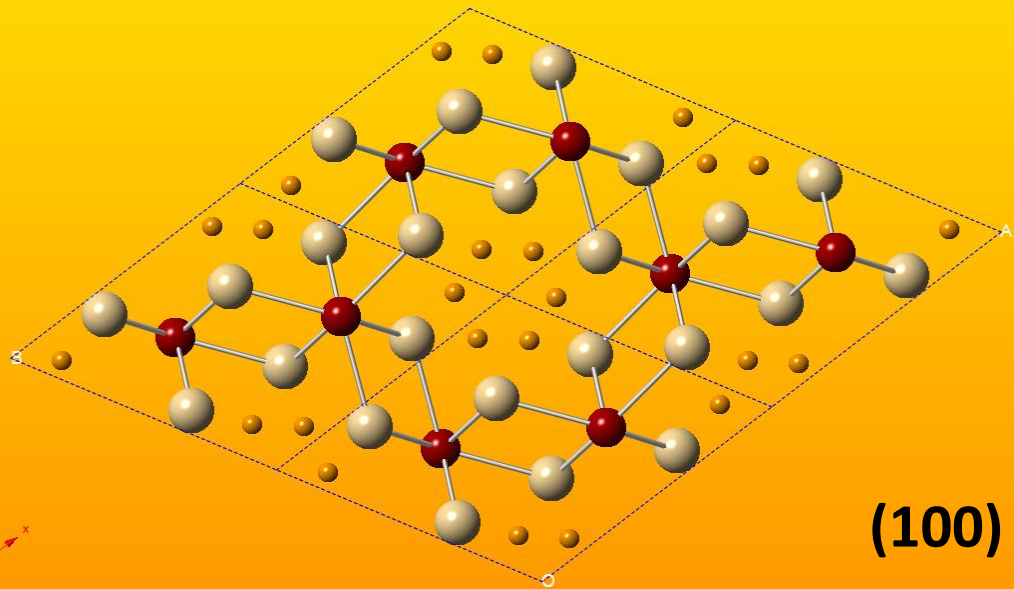

**(100)**

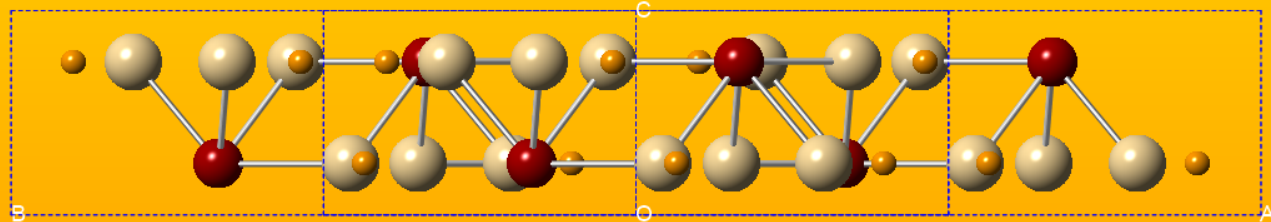

**(110)**

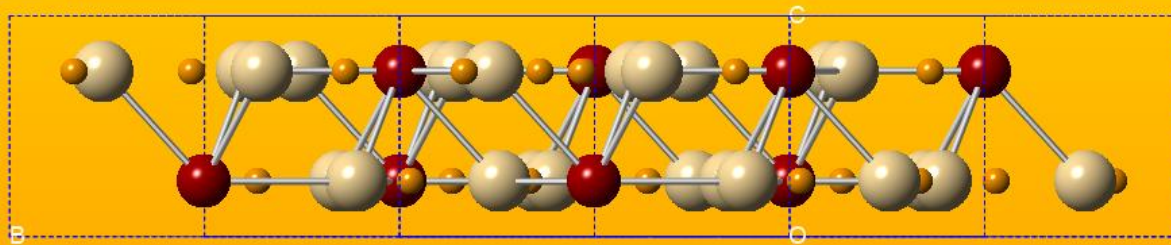

**(200)**

Supplement: FigureS7.pdf [file FigureS7.pdf]
